# Supplementary material for: Crystal structure and ferrimagnetism of AgCo 3 Cr(MoO 4 ) 5 with mixed occupation of the transition metal sites
Source: Royal Society of Chemistry journal article supplement (doi:10.1039/d4dt03353a), 2025-01-01
Supplement: d4dt03353a1.pdf [file d4dt03353a1.pdf]

Supporting Information

for

**Crystal structure and ferrimagnetism of  $\text{AgCo}_3\text{Cr}(\text{MoO}_4)_5$  with mixed occupation of the transition metal sites**

Irina Kotova,<sup>a</sup> Tatyana Spiridonova,<sup>a</sup> Alexandra Savina,<sup>b</sup> Elena Khaikina,<sup>a</sup> Sergey Solodovnikov,<sup>c</sup> Zoya Solodovnikova,<sup>c</sup> Hyun-Joo Koo,<sup>d</sup> Myung-Hwan Whangbo,<sup>d,e</sup> Yevgeniy Ovchenkov,<sup>f</sup> Konstantin Zakharov,<sup>f</sup> Tatyana Vasilchikova,<sup>f</sup> Larisa Shvanskaya,<sup>f,g</sup> Alexander Vasiliev,<sup>f,g\*</sup>

<sup>a</sup>*Baikal Institute of Nature Management, SB RAS, Ulan-Ude 670047, Russia*

<sup>b</sup>*Skolkovo Institute of Science and Technology, Moscow 121205, Russia*

<sup>c</sup>*Nikolaev Institute of Inorganic Chemistry, SB RAS, Novosibirsk 630090, Russia*

<sup>d</sup>*Kyung Hee University, Seoul 02447, Republic of Korea*

<sup>e</sup>*North Carolina State University, Raleigh, North Carolina 27695-8204, USA*

<sup>f</sup>*Lomonosov Moscow State University, Moscow 119991, Russia*

<sup>g</sup>*National University of Science and Technology MISIS, Moscow 119049, Russia*

\* E-mail: vasil@lt.phys.msu.ru

Table 1S. Preparation conditions of simple molybdates and silver dimolybdate

| Composition                        | Reaction mixture                                                      | Annealing temperature, K |
|------------------------------------|-----------------------------------------------------------------------|--------------------------|
| $\text{Ag}_2\text{MoO}_4$          | $2\text{AgNO}_3 + \text{MoO}_3$                                       | 623–723                  |
| $\text{Ag}_2\text{Mo}_2\text{O}_7$ | $\text{Ag}_2\text{MoO}_4 + \text{MoO}_3$                              | 573–663                  |
| $\text{NiMoO}_4$                   | $\text{NiO} + \text{MoO}_3$                                           | 723–1023                 |
| $\text{CoMoO}_4$                   | $\text{Co}(\text{NO}_3)_3 \cdot 6\text{H}_2\text{O} + \text{MoO}_3$   | 573–1023                 |
| $\text{Cr}_2(\text{MoO}_4)_3$      | $2\text{Cr}(\text{NO}_3)_3 \cdot 9\text{H}_2\text{O} + 3\text{MoO}_3$ | 573–1023                 |
| $\text{Sc}_2(\text{MoO}_4)_3$      | $\text{Sc}_2\text{O}_3 + 3\text{MoO}_3$                               | 723–1023                 |
| $\text{In}_2(\text{MoO}_4)_3$      | $\text{In}_2\text{O}_3 + 3\text{MoO}_3$                               | 723–1073                 |

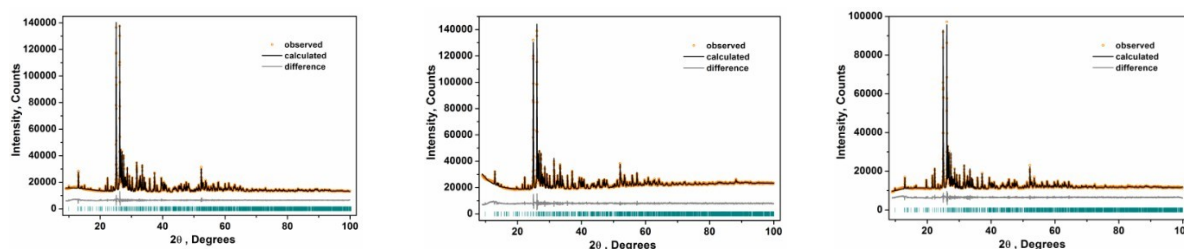

Fig. S1. Experimental, calculated and difference powder XRD patterns of  $\text{AgNi}_3\text{In}(\text{MoO}_4)_5$  (left),  $\text{AgCo}_3\text{In}(\text{MoO}_4)_5$  (center) and  $\text{AgCo}_3\text{Sc}(\text{MoO}_4)_5$  (right). Bragg reflection positions (sp. gr.  $P\bar{1}$ ) are marked with green vertical lines.

Table S2. Atomic coordinates and equivalent isotropic displacement parameters for  $\text{Ag}_{0.92}\text{Co}_{2.93}\text{Cr}_{1.07}(\text{MoO}_4)_5$ .

| Atom | Occupancy             | $x/a$      | $y/b$      | $z/c$        | $U_{\text{eq}} (\text{\AA}^2)^*$ |
|------|-----------------------|------------|------------|--------------|----------------------------------|
| Mo1  | 1                     | 0.27451(4) | 0.30799(4) | 0.52669(2)   | 0.00745(5)                       |
| Mo2  | 1                     | 0.21304(4) | 0.82551(4) | 0.28461(2)   | 0.00795(6)                       |
| Mo3  | 1                     | 0.68746(4) | 0.21936(4) | 0.31020(2)   | 0.00952(6)                       |
| Mo4  | 1                     | 0.27479(4) | 0.05996(3) | 0.90598(2)   | 0.00727(5)                       |
| Mo5  | 1                     | 0.24698(4) | 0.54549(4) | 0.08640(2)   | 0.00805(6)                       |
| M1   | 0.719(3)Co+0.281(3)Cr | 0.18163(7) | 0.82750(6) | 0.49274(2)   | 0.00761(9)                       |
| M2   | 0.946(3)Co+0.054(3)Cr | 0.16823(7) | 0.08268(6) | 0.11591(2)   | 0.00832(9)                       |
| M3   | 0.789(3)Co+0.211(3)Cr | 0.77820(7) | 0.42397(6) | 0.12572(2)   | 0.00770(9)                       |
| M4   | 0.469(3)Co+0.531(3)Cr | 0.24974(7) | 0.30574(6) | 0.73573(2)   | 0.00756(9)                       |
| Ag1  | 0.295(3)              | 0.1457(5)  | 0.3429(4)  | 0.2789(3)    | 0.0379(7)                        |
| Ag2  | 0.306(3)              | 0.1126(6)  | 0.3362(4)  | 0.3185(3)    | 0.0293(10)                       |
| Ag3  | 0.322(3)              | 0.1131(6)  | 0.3425(6)  | 0.3415(2)    | 0.0298(7)                        |
| O1   | 1                     | 0.5233(4)  | 0.2098(3)  | 0.50514(14)  | 0.0175(5)                        |
| O2   | 1                     | 0.2498(4)  | 0.3512(4)  | 0.62410(13)  | 0.0209(6)                        |
| O3   | 1                     | 0.2034(4)  | 0.5318(3)  | 0.47672(13)  | 0.0160(5)                        |
| O4   | 1                     | 0.1257(4)  | 0.1321(3)  | 0.50369(13)  | 0.0126(4)                        |
| O5   | 1                     | 0.1906(4)  | 0.8770(3)  | 0.38041(12)  | 0.0177(5)                        |
| O6   | 1                     | 0.4573(4)  | 0.7161(3)  | 0.26217(13)  | 0.0163(5)                        |
| O7   | 1                     | 0.1533(4)  | 0.0516(3)  | 0.23283(13)  | 0.0150(5)                        |
| O8   | 1                     | 0.0498(4)  | 0.6616(3)  | 0.26674(13)  | 0.0153(5)                        |
| O9   | 1                     | 0.4417(4)  | 0.2915(4)  | 0.33654(14)  | 0.0242(6)                        |
| O10  | 1                     | 0.7180(4)  | -0.0127(3) | 0.27067(14)  | 0.0209(6)                        |
| O11  | 1                     | 0.8280(4)  | 0.2045(3)  | 0.39180(12)  | 0.0158(5)                        |
| O12  | 1                     | 0.7686(4)  | 0.3997(3)  | 0.24385(12)  | 0.0124(4)                        |
| O13  | 1                     | 0.2067(4)  | 0.1138(3)  | 0.99918(12)  | 0.0173(5)                        |
| O14  | 1                     | 0.5253(4)  | -0.0368(4) | 0.89493(14)  | 0.0192(5)                        |
| O15  | 1                     | 0.1446(3)  | -0.1262(3) | 0.88103(12)  | 0.0104(4)                        |
| O16  | 1                     | 0.2328(3)  | 0.2875(3)  | 0.85023(12)  | 0.0100(4)                        |
| O17  | 1                     | 0.4802(4)  | 0.4570(4)  | 0.12224(14)  | 0.0196(5)                        |
| O18  | 1                     | 0.2461(4)  | 0.5360(4)  | -0.01202(13) | 0.0196(5)                        |
| O19  | 1                     | 0.1673(4)  | 0.7906(3)  | 0.11048(14)  | 0.0201(5)                        |
| O20  | 1                     | 0.0860(3)  | 0.3863(3)  | 0.12475(12)  | 0.0114(4)                        |

\* $U_{\text{eq}}$  is defined as one third of the trace of the orthogonalized  $U_{ij}$  tensor.

Table S3. Selected interatomic distances (Å) in Ag<sub>0.92</sub>Co<sub>2.93</sub>Cr<sub>1.07</sub>(MoO<sub>4</sub>)<sub>5</sub> structure.

|                       |          |                       |          |                       |          |
|-----------------------|----------|-----------------------|----------|-----------------------|----------|
| Mo1-tetrahedron       |          | Mo2-tetrahedron       |          | Mo3-tetrahedron       |          |
| Mo1–O1                | 1.745(2) | Mo2–O5                | 1.737(2) | Mo3–O9                | 1.714(3) |
| –O2                   | 1.753(2) | –O6                   | 1.739(2) | –O10                  | 1.756(2) |
| –O3                   | 1.759(2) | –O7#1                 | 1.779(2) | –O11                  | 1.762(2) |
| –O4                   | 1.810(2) | –O8                   | 1.794(2) | –O12                  | 1.834(2) |
| <Mo1–O>               | 1.767    | <Mo2–O>               | 1.762    | <Mo3–O>               | 1.767    |
| Mo4-tetrahedron       |          | Mo5-tetrahedron       |          | <i>M1</i> -octahedron |          |
| Mo4–O13               | 1.725(2) | Mo5–O17               | 1.743(3) | <i>M1</i> –O1#2       | 1.997(2) |
| –O14                  | 1.729(3) | –O18                  | 1.743(2) | –O5                   | 2.002(2) |
| –O15                  | 1.790(2) | –O19                  | 1.751(2) | –O11#2                | 2.043(2) |
| –O16                  | 1.817(2) | –O20                  | 1.806(2) | –O3                   | 2.065(2) |
| <Mo4–O>               | 1.765    | <Mo5–O>               | 1.761    | –O4#3                 | 2.076(1) |
|                       |          |                       |          | –O4#1                 | 2.096(1) |
|                       |          |                       |          | < <i>M</i> (1)–O>     | 2.046    |
| <i>M2</i> -octahedron |          | <i>M3</i> -octahedron |          | <i>M4</i> -octahedron |          |
| <i>M2</i> –O19#4      | 2.042(2) | <i>M3</i> –O17        | 2.021(3) | <i>M4</i> –O2         | 1.986(2) |
| –O7                   | 2.069(2) | –O18#8                | 2.028(2) | –O6#2                 | 1.993(2) |
| –O14#5                | 2.070(3) | –O15#5                | 2.046(2) | –O10#5                | 2.017(2) |
| –O13#6                | 2.076(2) | –O16#2                | 2.056(2) | –O16                  | 2.022(2) |
| –O20                  | 2.091(2) | –O20#9                | 2.081(2) | –O8#3                 | 2.031(2) |
| –O15#7                | 2.112(2) | –O12                  | 2.087(2) | –O12#2                | 2.075(2) |
| < <i>M2</i> –O>       | 2.077    | < <i>M3</i> –O>       | 2.053    | < <i>M4</i> –O>       | 2.012    |
| Ag1-polyhedron        |          | Ag2-polyhedron        |          | Ag3-polyhedron        |          |
| Ag1–O8                | 2.207(3) | Ag2–O9                | 2.260(5) | Ag3–O9                | 2.217(5) |
| –O9                   | 2.230(4) | –O8                   | 2.380(4) | –O11#10               | 2.461(5) |
| –O7                   | 2.249(3) | –O7                   | 2.503(5) | –O8                   | 2.518(4) |
| –O12#10               | 2.677(4) | –O11#10               | 2.592(5) | –O7                   | 2.809(5) |
| –O20                  | 2.875(4) | –O12#10               | 2.716(4) | –O3                   | 2.919(4) |
| <Ag1–O>               | 2.448    | <Ag2–O>               | 2.490    | –O12#10               | 2.953(4) |
| Ag1–Ag2               | 0.627(4) | Ag1–Ag3               | 1.014(5) | –O2#3                 | 3.007(5) |
| Ag2–Ag3               | 0.412(6) |                       |          | <Ag3–O>               | 2.694    |

Symmetry transformations used to generate equivalent atoms:

#1  $x, y+1, z$ ; #2  $1-x, 1-y, 1-z$ ; #3  $-x, 1-y, 1-z$ ; #4  $x, y-1, z$ ; #5  $1-x, -y, 1-z$ ; #6  $x, y, z-1$ ; #7  $-x, -y, 1-z$ ; #8  $1-x, 1-y, -z$ ; #9  $x+1, y, z$ ; #10  $x-1, y, z$ .

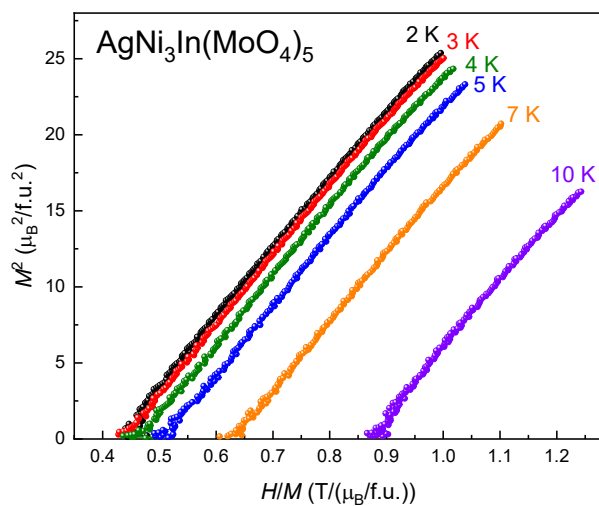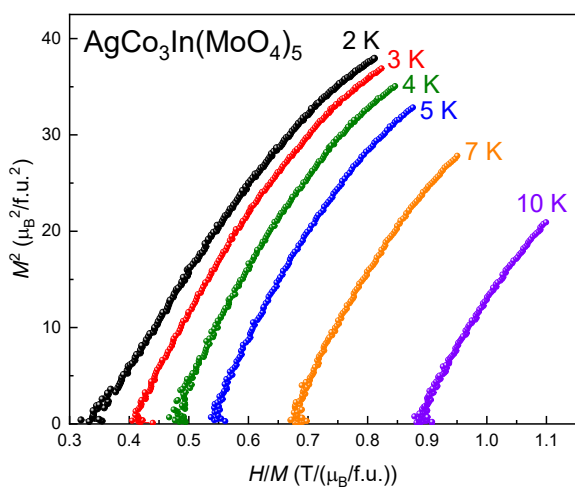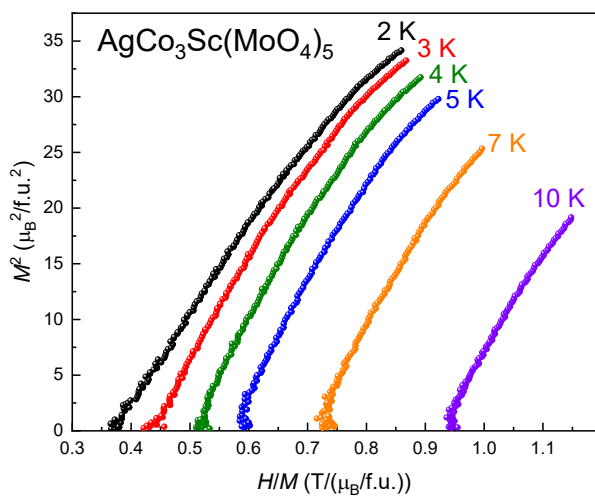

Fig. S2. The Arrott plots for  $\text{AgNi}_3\text{In}(\text{MoO}_4)_5$ ,  $\text{AgCo}_3\text{In}(\text{MoO}_4)_5$  and  $\text{AgCo}_3\text{Sc}(\text{MoO}_4)_5$  compounds.
